# Supplementary material for: Gene Network Analysis of Glucose Linked Signaling Pathways and Their Role in Human Hepatocellular Carcinoma Cell Growth and Survival in HuH7 and HepG2 Cell Lines
Source: Biomed Res Int. 2015 Aug 24;2015:821761. doi: 10.1155/2015/821761 (PMC4561296; doi:10.1155/2015/821761)
Supplement: Supplementary file 1 — Suppl Information 1 : Gene datasets regulated by intracellular pathways (left panel) and transcrition factors (right panel). Suppl Information 2: Hepatic genes differentially expressed in Hepg2 versus HuH7 cells (red: up-regulated, green: down-regulated). Genes present in hepatocellularcarcinoma gene sets are in yellow. IL6R is a unique gene regulated by glucose (27). [file 821761.f1.xlsx]

## Sheet: Gene sets
Suppl Information 1 : Gene datasets regulated by intracellular pathways (left panel) and transcrition factors (right panel).
INTACELLULAR PATHWAYS					TRANSCRPTION FACTORS
Pathway	n	PMID or GEO	Reference		Trancription factor	n	PMID or GEO	First author	TREDD
Translation mTOR	334	11943782	Grolleau et al, 2002		ATFs	62			x
		14576155	Gera et al, 2004		CEBPA	263	22536322	Wang et al, 2012	x
Translation AKT	92	14576155	Gera et al, 2004		CEBPB	236	22536322	Wang et al, 2012	x
Translation PTEN	122	14576155	Gera et al, 2004		CEBPD	439	22536322	Wang et al, 2012	x
ABL	218	22536322	Wang et al, 2012		CEBPZ	135	22536322	Wang et al, 2012
Hyper Methylation	1884	17024368	Hayashi et al, 2006		CHREBP HepG2	781	21811631	Jeong et al, 2011
Hyper Methylation (HepG2)	3914	16854234	Dannenberg et al, 2006		CREB	803	15691874	Bailey et al, 2005	x
Adenylate cyclase HepG2	128	22955979	Charos et al, 2012				15753290	Zhang et al, 2005
AKT	1401	17437629	Ruggiero et al, 2007		CREBBP	268	22536322	Wang et al, 2012
		22536322	Wang et al, 2012		E2Fs	1636	11799067	Ren et al, 2002	x
		18838536	Bhat-Nakshatri et al, 08		EGR1	86	12210033	Liu et al, 2002;
		16007182	Portsmann et al, 2005				14557062	Fu et al, 2003
		17099727	Xu et al, 2007		Elk1	27			x
AMPK	1914				ESR1, ESR2	111			x
p53 idt HepG2	278	GSE30137	Goldstein & Rotter, 2012		Ets	101	11175369	Sementchenko & Watson 2000	x
AMPK-p53 HepG2	161	GSE30137	Goldstein & Rotter, 2012		FOS	171	22536322	Wang et al, 2012	x
AMPKa1	51	19347029	Zhou et al, 2009		FOXO1A (FKHR)	641	12150827	Ramaswamy et al, 2002
AICAR	1188	GSE16816	Sangbae et al, 2012				22536322	Wang et al, 2012
AICAR-2DG	1356	GSE16816	Sangbae et al, 2012		FOXO1A HepG2	422	18301748	DeCandia et al, 2008
		16959035	Huang et al, 2006		FOXM1	828	15958562	Wonsey et al, 2006
BRCA1	782	15520196	Bae et al, 2004				22536322	Wang et al, 2012
		22646717	Ifroda et al, 2012		FOXO3A	648	18032780	Lee et al, 2008
Ca storage	432	15623568	Zagranichnaya et al, 2005				22536322	Wang et al, 2012
		22829784	Hopkin et al, 2012		FXRA	967	17132852	Moore et al, 2006
		16461377	Pulver-Kaste et al, 2006		FXRA HepG2	951	15147890	Sirvent et al, 2004
		GSE4956	Benesic et al, 2006		HER2	377	19372741	Oliverra-Ferreros et al, 2009
CHEK1	212	22536322	Wang et al, 2012		HIF1A	281	15833863	Wang et al, 2005	x
CCNA2	407	22536322	Wang et al, 2012		HIF1A HepG2	198	19255431	Xia et al, 2009
CCNB1, 2	1000	22536322	Wang et al, 2012		HIF2A	25	15833863	Wang et al, 2005
CCND3	317	22536322	Wang et al, 2012		HNF1A	54	14988562	Odom et al, 2004
CCNG2	55	22536322	Wang et al, 2012				16760900	Das et al, 2006
CDKN2A	100	22536322	Wang et al, 2012		HNF3B (FOXA2) HepG2	63	16221759	Rada-Iglesias 2005
CDKN2C	170	22536322	Wang et al, 2012		HNF4	1013	14988562	Odom et al, 2004
Compound C	280	23029271	Saito et al, 2012				11834723	Naiki et al, 2002
CC-2DG (UPR)	2621	23029271	Saito et al, 2012		HNF4A HepG2	936	21047794	Daigoe 2011
COP1 (HepG2 & HuH7)	78	20959491	Lee et al, 2010		HNF6	109	14988562	Odom et al, 2004
COX-2 (HuH7 vs HepG2)	106	21410330	Cervello et al, 2011		HOX	32			x
EGFR1	252		NetPath		JUN	169			x
G b/g	16	15983374	Hwang et al, 2005		KLF4	158	125881631	Chen et al, 2003
Glycolysis (2DG)	251	GSE16816	Sangbae K 2012		LEF1	30			x
		23029271	Saito et al, 2012		LXR	179	17628011	Kotokorpi et al, 2007
Glucose oxidase	179	20466008	Platel et al, 2010		MCM2	942	22536322	Wang et al, 2012
GPI-PLD HepG2	253	16595594	Chalasani et al, 2006		MIF	35	18469521	Liu L et al, 2008
GSK3	62	16007182	Portsman et a, 2005		MIZ-1 HepG2	43	14704274	Ziegelbauer 04
HDACs	938	17012225	Milutinoic et al, 07		MYC	789	10737792	Coller et al, 2000	x
		22536322	Wang et al, 2012				11250904	Boon et al, 2001
HDAC (HepG2)	43	15336447	Chiba et al, 2004		MYB				x
		16854234	Dannenberg et al, 2006		NFAT	97	GSE4956	Benesic et al, 2006
Ki-Ras	92	16446406	Spence et al, 2006		NFE2L2(NRF2)	191	22020111	Hybertson et al, 2011
		16158056	Seiden-Long et al, 06				17875642	Kimura et al, 2007
JNK	104	16648634	Gazel et al, 2006		NFKB	266	15722553	Tian et al, 2005	x
		18281687	Hoffmann et al, 2008		NFkB HepG2	193	19038492	Prasad et al, 2009
LKB1	2216	12649203	Jimenez et al, 2003		Oct1/POU2F1	104			x
Metformin	1329	GSE16816	Sangbae et al, 2012		PPARs	420	21533120	Roque et al, 2011	x
Metformin HER2		19372741	Oliverra-Ferreros et al, 2009		PPARA HepG2	72	16197558	Tachibana et al, 2005
Metformin-2DG	1231	GSE16816	Sangbae et al, 2012		PPARD HepG2	101	16197558	Tachibana et al, 2005	x
Erk1/2 (MAP2K1)	839	16735500	Schweppe et al, 2006		PPARG HepG2	219	16197558	Tachibana et al, 2005	x
		22536322	Wang et al, 2012				17031537	Guo et al, 2006
MEK	1154	12941840	Taxman et al, 2003		PPARGC1A	625	18242180	Lee et al, 2008
MELK		22945237	Kuner et al, 2013				22272266	Mormeneo et al, 2012
MKK5/Erk5	30	16735500	Schweppe et al, 2006		PPARGC1A/ERRA HepG2	69	17157261	Gaillard et al, 2006
mTOR	678	17483347	Parent et al, 2007		PXR	14	18305371	Lim & Huang, 2008	x
		11943782	Grolleau et al, 2002		RARA	100			x
NOX1	1252	GSE4561	Juhasz et al, 2006		RARg	36			x
P38MAPK (MAPK14)	317	15169874	Lin et al, 2004		RB1	622	22536322	Wang et al, 2012
		22536322	Wang et al, 2012		RORA (HepG2)	12	21818335	Chauvet et al, 2011
Pi3K	249	18226221	Terragni et al, 2008		RXR	170	17178900	Kim et a, 2006
		17141757	Hjortsberg et al, 2007		SMADS	125	17960585	Yu et al, 2008	x
PKA	88	16751804	Wang et al, 2006				16135802	Levy et al, 2005
		14532334	Tierney et al, 2003		SOX(4,5,9)	1951	18504433	Liao et al, 2008
PKC	55	15375488	Lacroix et al, 2004				17935617	Tue et al, 2007
PTEN	114	11325847	Matsushima-Nishiu et al, 2001				16439615	Yiostalo et al, 2005
RAC1	38	17766170	Gomez del Pulgar et al, 2007		Sp2	2165	22684502	Terradios et al, 2012
N-RAS	455	17409441	Blum et al, 2007		SREBP1A	1201	18559965	Rome et al, 2008
		17533045	Shen et al, 2007		SREBP1c	529	18559965	Rome et al, 2008
RRM2B (P53R2)	81	21216934	Zhang et al, 2011		SREBP1c HepG2	30	18654640	Reed et al, 2008
TEL2	114	22536322	Wang et al, 2012		STATs	79			x
TSC1/2	44	12894220	Rosner et al, 2003		TFAM	30	21453679	Han et al, 2011
Wnt/bCatenin	217	16959035	Huang et al, 2006		TP53	282			x
					USF	98			x

## Sheet: Dereg HepG2vsHuhlist
Suppl Information 2: Hepatic genes differentially expressed in Hepg2 versus HuH7 cells (red: up-regulated, green: down-regulated). Genes present in hepatocellularcarcinoma gene sets are in yellow. IL6R is a unique gene regulated by glucose (Jeon et al 2011).
Symbol	Name	GeneID	SPFunction
ANGPTL3	angiopoietin-like 3	27329
AOC3	amine oxidase, copper containing 3 (vascular adhesion protein 1)	8639	cell adhesion protein that participates in lymphocyte recirculation by mediating the binding of lymphocytes to peripheral lymph node vascular endothelial cells in an l-selectin- independent fashion. has a monoamine oxidase activity. may play a role in adi
AURKB	aurora kinase B	9212	serine/threonine-protein kinase component of the chromosomal passenger complex (cpc), a complex that acts as a key regulator of mitosis. the cpc complex has essential functions at the centromere in ensuring correct chromosome alignment and segregation and
BEXL1	brain expressed, X-linked 4	56271
BHMT2	betaine--homocysteine S-methyltransferase 2	23743	involved in the regulation of homocysteine metabolism. converts homocysteine to methionine using s-methylmethionine (smm) as a methyl donor.
BMP2	bone morphogenetic protein 2	650	induces cartilage and bone formation.
C5orf13 (NREP)	neuronal regeneration related protein	9606
CALM1	calmodulin 1 (phosphorylase kinase, delta)	801	calmodulin mediates the control of a large number of enzymes, ion channels and other proteins by ca(2+). among the enzymes to be stimulated by the calmodulin-ca(2+) complex are a number of protein kinases and phosphatases. together with cep110 and centrin
CCL14	chemokine (C-C motif) ligand 14	6358	has weak activities on human monocytes and acts via receptors that also recognize mip-1 alpha. it induced intracellular ca(2+) changes and enzyme release, but no chemotaxis, at concentrations of 100-1,000 nm, and was inactive on t-lymphocytes, neutrophils
CD24	In multiple Geneids	100133941
CDC7	cell division cycle 7 homolog (S. cerevisiae)	8317	seems to phosphorylate critical substrates that regulate the g1/s phase transition and/or dna replication. can phosphorylates mcm2 and mcm3.
CEACAM1	carcinoembryonic antigen-related cell adhesion molecule 1 (biliary glycoprotein)	634
CECR5	cat eye syndrome chromosome region, candidate 5	27440
CITED2	Cbp/p300-interacting transactivator, with Glu/Asp-rich carboxy-terminal domain, 2	10370	transcriptional coactivator of the p300/cbp-mediated trancription complex. acts as a bridge, linking tfap2 transcription factors and the p300/cbp transcriptional coactivator complex in order to stimulate tfap2-mediated transcriptional activation. positive
COL5A2	collagen, type V, alpha 2	1290	type v collagen is a member of group i collagen (fibrillar forming collagen). it is a minor connective tissue component of nearly ubiquitous distribution. type v collagen binds to dna, heparan sulfate, thrombospondin, heparin, and insulin. type v collagen
CP	ceruloplasmin (ferroxidase)	1356	ceruloplasmin is a blue, copper-binding (6-7 atoms per molecule) glycoprotein. it has ferroxidase activity oxidizing fe(2+) to fe(3+) without releasing radical oxygen species. it is involved in iron transport across the cell membrane. provides cu(2+) ions
CPE	carboxypeptidase E	1363	removes residual c-terminal arg or lys remaining after initial endoprotease cleavage during prohormone processing. processes proinsulin.
CPM	carboxypeptidase M	1368	specifically removes c-terminal basic residues (arg or lys) from peptides and proteins. it is believed to play important roles in the control of peptide hormone and growth factor activity at the cell surface, and in the membrane-localized degradation of e
CYP2R1	cytochrome P450, family 2, subfamily R, polypeptide 1	120227
FAM13A1	family with sequence similarity 13, member A	19367
G0S2	G0/G1switch 2	50486	promotes apoptosis by binding to bcl2, hence preventing the formation of protective bcl2-bax heterodimers.
GHR	growth hormone receptor	2690	isoform 2 up-regulates the production of ghbp and acts as a negative inhibitor of gh signaling.
GK	glycerol kinase	2710	key enzyme in the regulation of glycerol uptake and metabolism.
GSTP1	glutathione S-transferase pi 1	2950	conjugation of reduced glutathione to a wide number of exogenous and endogenous hydrophobic electrophiles. regulates negatively cdk5 activity via p25/p35 translocation to prevent neurodegeneration.
HAL	histidine ammonia-lyase	3034
HIST1H1C	histone cluster 1, H1c	3006	histones h1 are necessary for the condensation of nucleosome chains into higher order structures.
HIST1H2BF	histone cluster 1, H2bf	8343	has broad antibacterial activity. may contribute to the formation of the functional antimicrobial barrier of the colonic epithelium, and to the bactericidal activity of amniotic fluid.
HMGCS1	3-hydroxy-3-methylglutaryl-CoA synthase 1 (soluble)	3157	this enzyme condenses acetyl-coa with acetoacetyl-coa to form hmg-coa, which is the substrate for hmg-coa reductase.
HPGD	hydroxyprostaglandin dehydrogenase 15-(NAD)	3248	prostaglandin inactivation. contributes to the regulation of events that are under the control of prostaglandin levels. catalyzes the nad-dependent dehydrogenation of lipoxin a4 to form 15-oxo-lipoxin a4. inhibits in vivo proliferation of colon cancer cel
HTATIP2	HIV-1 Tat interactive protein 2, 30kDa	10553	oxidoreductase required for tumor suppression. napdh- bound form inhibits nuclear import by competing with nuclear import substrates for binding to a subset of nuclear transport receptors. may act as a redox sensor linked to transcription through regulati
HYAL1	hyaluronoglucosaminidase 1	3373	may have a role in promoting tumor progression. may block the tgfb1-enhanced cell growth.
IL6R	interleukin 6 receptor	3570	low concentration of a soluble form of il6 receptor acts as an agonist of il6 activity.
KCNJ8	potassium inwardly-rectifying channel, subfamily J, member 8	3764	this potassium channel is controlled by g proteins. inward rectifier potassium channels are characterized by a greater tendency to allow potassium to flow into the cell rather than out of it. their voltage dependence is regulated by the concentration of e
LRMP	lymphoid-restricted membrane protein	4033
MAPK13	mitogen-activated protein kinase 13	5603	serine/threonine kinase which acts as an essential component of the map kinase signal transduction pathway. mapk13 is one of the four p38 mapks which play an important role in the cascades of cellular responses evoked by extracellular stimuli such as proi
MCM6	minichromosome maintenance complex component 6	4175	acts as component of the mcm2-7 complex (mcm complex) which is the putative replicative helicase essential for 'once per cell cycle' dna replication initiation and elongation in eukaryotic cells. the active atpase sites in the mcm2-7 ring are formed throu
MGLL	monoglyceride lipase	11343	converts monoacylglycerides to free fatty acids and glycerol. hydrolyzes the endocannabinoid 2-arachidonoylglycerol, and thereby contributes to the regulation of endocannabinoid signaling, nociperception and perception of pain (by similarity). regulates t
MPP6	membrane protein, palmitoylated 6 (MAGUK p55 subfamily member 6)	51678
MSRB2	methionine sulfoxide reductase B2	22921	catalyzes the reduction of free and protein-bound methionine sulfoxide to methionine (by similarity). upon oxidative stress, may play a role in the preservation of mitochondrial integrity by decreasing the intracellular reactive oxygen species build-up th
MSRB3	methionine sulfoxide reductase B3	253827	catalyzes the reduction of free and protein-bound methionine sulfoxide to methionine. isoform 2 is essential for hearing.
MT1M	metallothionein 1M	4499	metallothioneins have a high content of cysteine residues that bind various heavy metals; these proteins are transcriptionally regulated by both heavy metals and glucocorticoids.
NOS3	nitric oxide synthase 3 (endothelial cell)	4846	isoform enos13c: lacks enos activity, dominant-negative form that may downregulate enos activity by forming heterodimers with isoform 1.
NPR2	natriuretic peptide receptor B/guanylate cyclase B (atrionatriuretic peptide receptor B)	4882	receptor for the c-type natriuretic peptide nppc/cnp hormone. has guanylate cyclase activity upon binding of its ligand. may play a role in the regulation of skeletal growth.
NR4A2	nuclear receptor subfamily 4, group A, member 2	4929	transcriptional regulator which is important for the differentiation and maintenance of meso-diencephalic dopaminergic (mdda) neurons during development. it is crucial for expression of a set of genes such as slc6a3, slc18a2, th and drd2 which are essenti
NRG1	neuregulin 1	3084	direct ligand for erbb3 and erbb4 tyrosine kinase receptors. concomitantly recruits erbb1 and erbb2 coreceptors, resulting in ligand-stimulated tyrosine phosphorylation and activation of the erbb receptors. the multiple isoforms perform diverse functions
NUP155	nucleoporin 155kDa	9631	essential component of nuclear pore complex. nucleoporins may be involved both in binding and translocating proteins during nucleocytoplasmic transport (by similarity).
OAS1	2'-5'-oligoadenylate synthetase 1, 40/46kDa	4938	may play a role in mediating resistance to virus infection, control of cell growth, differentiation, and apoptosis.
PALM2	paralemmin 2	114299	binds to regulatory subunit (rii) of protein kinase a. may be involved in establishing polarity in signaling systems or in integrating pka-rii isoforms with downstream effectors to capture, amplify and focus diffuse, trans-cellular signals carried by camp
PAPSS2	3'-phosphoadenosine 5'-phosphosulfate synthase 2	9060	bifunctional enzyme with both atp sulfurylase and aps kinase activity, which mediates two steps in the sulfate activation pathway. the first step is the transfer of a sulfate group to atp to yield adenosine 5'-phosphosulfate (aps), and the second step is
PARP8	poly (ADP-ribose) polymerase family, member 8	79668
PFKM	phosphofructokinase, muscle	5213
PIPOX	pipecolic acid oxidase	51268	metabolizes sarcosine, l-pipecolic acid and l-proline.
PKIA	protein kinase (cAMP-dependant, catalytic) inhibitor alpha	5569
PLAGL1	pleiomorphic adenoma gene-like 1	5325	shows weak transcriptional activatory activity. transcriptional regulator of the type 1 receptor for pituitary adenylate cyclase-activating polypeptide.
PSPH	phosphoserine phosphatase	5723	catalyzes the last step in the biosynthesis of serine from carbohydrates. the reaction mechanism proceeds via the formation of a phosphoryl-enzyme intermediates.
RAB8B	RAB8B, member RAS oncogene family	51762	may be involved in vesicular trafficking and neurotransmitter release (by similarity). may participate in cell junction dynamics in sertoli cells (by similarity).
RHOD	ras homolog family member D	29984	involved in endosome dynamics. may coordinate membrane transport with the function of the cytoskeleton. participates in reorganization of actin cytoskeleton (by similarity).
RTN1	reticulon 1	6252	may be involved in neuroendocrine secretion or in membrane trafficking in neuroendocrine cells.
RUNX3	runt-related transcription factor 3	864	cbf binds to the core site, 5'-pygpyggt-3', of a number of enhancers and promoters, including murine leukemia virus, polyomavirus enhancer, t-cell receptor enhancers, lck, il-3 and gm-csf promoters.
SERPINE2	serpin peptidase inhibitor, clade E (nexin, plasminogen activator inhibitor type 1), member 2	5270	serine protease inhibitor with activity toward thrombin, trypsin, and urokinase. promotes neurite extension by inhibiting thrombin. binds heparin.
SLC17A2	solute carrier family 17 (sodium phosphate), member 2	10246	may be involved in actively transporting phosphate into cells via na(+) cotransport (by similarity).
SLC19A3	solute carrier family 19, member 3	80704	mediates high affinity thiamine uptake, propably via a proton anti-port mechanism. has no folate transport activity.
SLC38A4	solute carrier family 38, member 4	55089	sodium-dependent amino acid transporter. mediates electrogenic symport of neutral amino acids and sodium ions. has a broad specificity, with a preference for ala, followed by his, cys, asn, ser, gly, val, thr, gln and met. may mediate sodium- independent
SLC39A8	solute carrier family 39 (zinc transporter), member 8	64116	acts as a zinc-influx transporter.
SRI	sorcin	6717	calcium-binding protein that modulates excitation- contraction coupling in the heart. contributes to calcium homeostasis in the heart sarcoplasmic reticulum. modulates the activity of ryr2 calcium channels.
SULT1A1	sulfotransferase family, cytosolic, 1A, phenol-preferring, member 1	6817	sulfotransferase that utilizes 3'-phospho-5'-adenylyl sulfate (paps) as sulfonate donor to catalyze the sulfate conjugation of catecholamines, phenolic drugs and neurotransmitters. has also estrogen sulfotransferase activity. responsible for the sulfonati
THBS4	thrombospondin 4	7060	acts as an extracellular mitogen and stimulates early erythroid progenitors proliferation in presence of epo. adhesive glycoprotein that mediates cell-to-cell and cell-to-matrix interactions. can bind to fibrinogen, fibronectin, laminin and type v collage
TPM3	tropomyosin 3	7170	binds to actin filaments in muscle and non-muscle cells. plays a central role, in association with the troponin complex, in the calcium dependent regulation of vertebrate striated muscle contraction. smooth muscle contraction is regulated by interaction w
TRIP6	thyroid hormone receptor interactor 6	7205	relays signals from the cell surface to the nucleus to weaken adherens junction and promote actin cytoskeleton reorganization and cell invasiveness. involved in lysophosphatidic acid-induced cell adhesion and migration. acts as a transcriptional coactivat
UBE2C	ubiquitin-conjugating enzyme E2C	11065	accepts ubiquitin from the e1 complex and catalyzes its covalent attachment to other proteins. in vitro catalyzes 'lys- 11'- and 'lys-48'-linked polyubiquitination. acts as an essential factor of the anaphase promoting complex/cyclosome (apc/c), a cell cy
ZBTB16	zinc finger and BTB domain containing 16	7704	probable transcription factor. may play a role in myeloid maturation and in the development and/or maintenance of other differentiated tissues. probable substrate-recognition component of an e3 ubiquitin-protein ligase complex which mediates the ubiquitin
ZNF22	zinc finger protein 22 (KOX 15)	7570	binds dna through the consensus sequence 5'-caatg-3'. may be involved in transcriptional regulation and may play a role in tooth formation (by similarity).
ZNF43	zinc finger protein 43	7594	may be involved in transcriptional regulation.
